# Supplementary material for: An efficient and stable tin-based perovskite solar cell passivated by aminoguanidine hydrochloride
Source: Royal Society of Chemistry journal article supplement (doi:10.1039/d0tc01464h), 2020-01-01
Supplement: d0tc01464h1.pdf [file d0tc01464h1.pdf]

**An Efficient and Stable Tin-Based Perovskite Solar Cells Passivated by  
Aminoguanidine Hydrochloride**

Qingxia Fu<sup>a</sup>, Xianglan Tang<sup>a</sup>, Dengxue Li<sup>a,b</sup>, Lu Huang<sup>a</sup>, Shuqin Xiao<sup>a,b</sup>, Yiwang Chen<sup>a,c</sup>, Ting Hu<sup>\*a,b</sup>

<sup>a</sup>College of Chemistry/Institute of Polymers and Energy Chemistry (IPEC), Nanchang  
University, 999 Xuefu Avenue, Nanchang 330031, China

<sup>b</sup>School of Materials Science and Engineering, Nanchang University, 999 Xuefu  
Avenue, Nanchang 330031, China

<sup>c</sup>Institute of Advanced Scientific Research (iASR), Jiangxi Normal University, 99  
Ziyang Avenue, Nanchang 330022, China

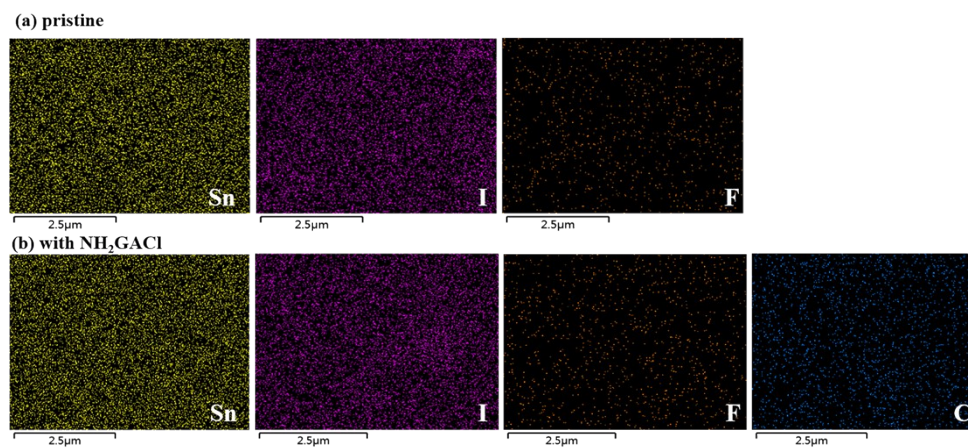

**Figure S1.** Energy-dispersive X-ray (EDS) spectroscopy mapping of Sn, I, F, and Cl in (a) pristine and (b)  $\text{NH}_2\text{GACl}$  incorporated perovskite film.

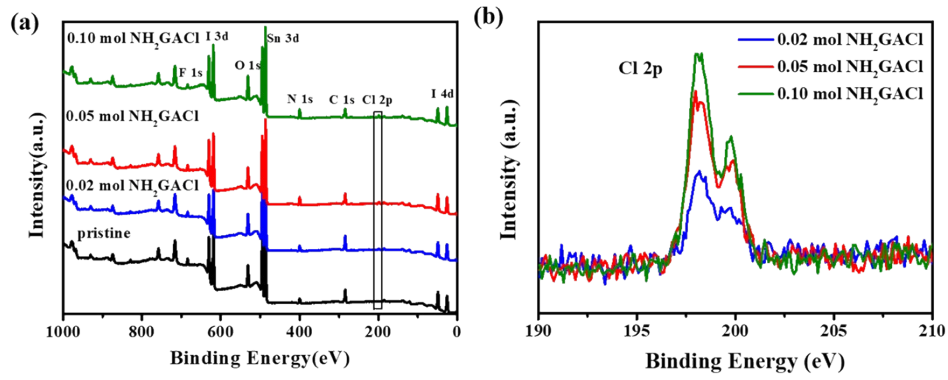

**Figure S2.** (a) XPS spectra of the perovskite films. (b) XPS spectra (Cl 2p) of the perovskite films with 0.02 mol, 0.05 mol and 0.10 mol  $\text{NH}_2\text{GACl}$ .

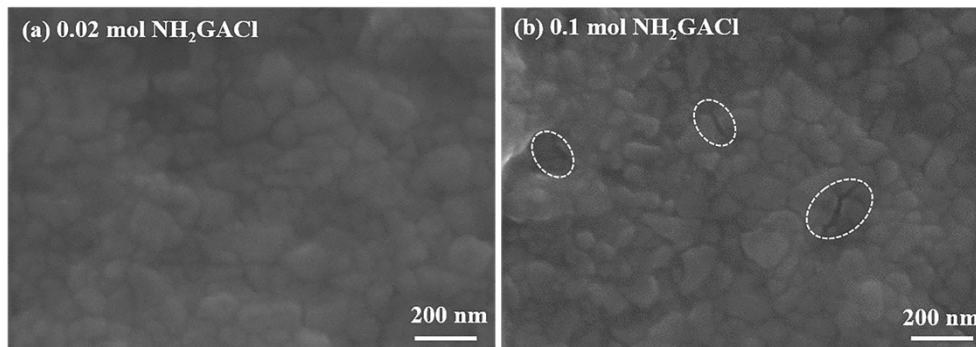

**Figure S3.** SEM images of the perovskite films with (a) 0.02 mol and (b) 0.10 mol NH<sub>2</sub>GACI-doped on ITO/PEDOT:PSS layers.

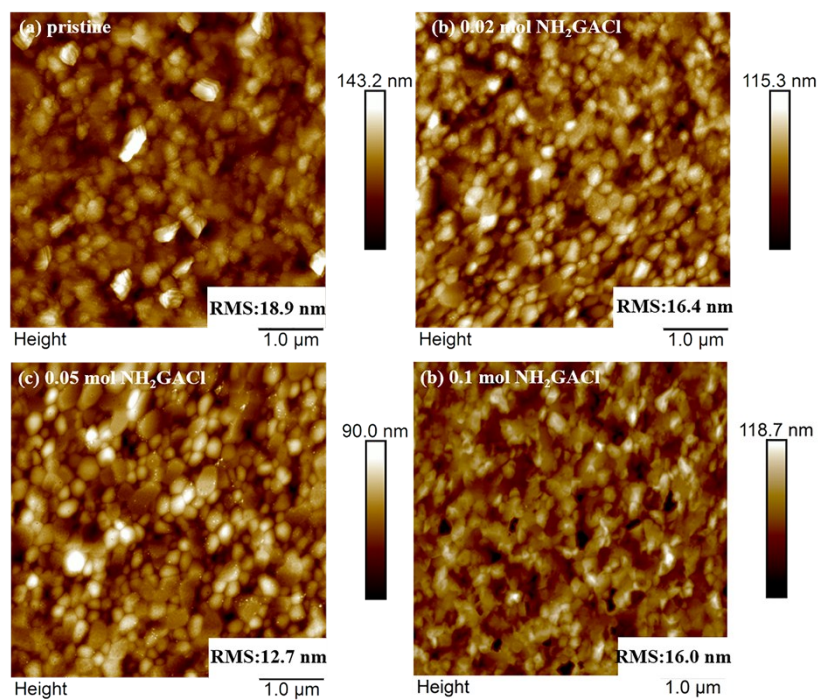

**Figure S4.** AFM images of the perovskite films on ITO/PEDOT:PSS layers with various proportions of NH<sub>2</sub>GACl additive: (a) pristine, (b) 0.02 mol, (c) 0.05 mol and (d) 0.10 mol, respectively.

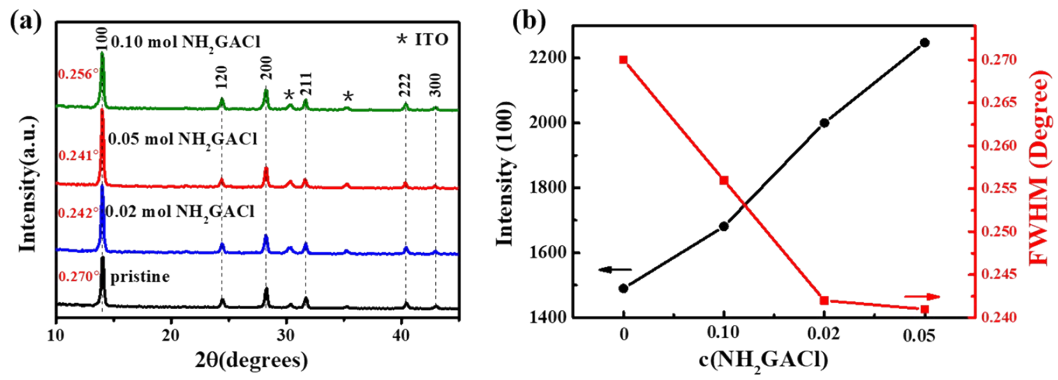

**Figure S5.** (a) X-ray diffraction patterns and (b) the corresponding full width at half maximum diffraction peaks of the perovskite films with varying concentrations of  $\text{NH}_2\text{GACl}$  additive (0 mol, 0.02 mol, 0.05 mol and 0.10 mol).

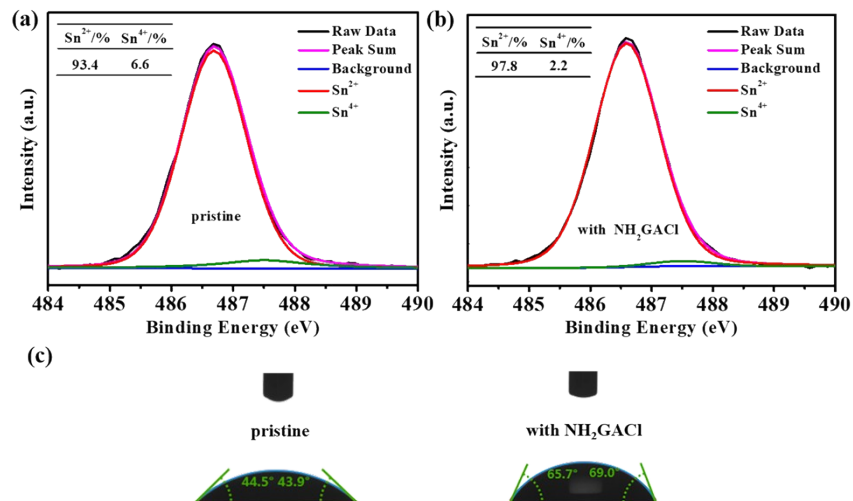

**Figure S6.** (a, b) X-ray photoelectron spectra (Sn 3d) of the pristine and perovskite films modified with NH<sub>2</sub>GACl. (c) The contact angles between perovskite films (the pristine or NH<sub>2</sub>GACl-modified) and water.

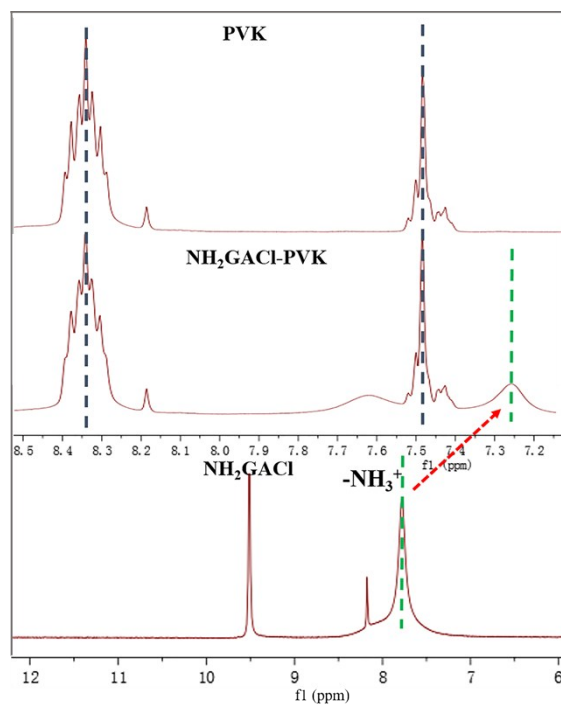

**Figure S7.** <sup>1</sup>H NMR spectra of NH<sub>2</sub>GACI, perovskite and perovskite- NH<sub>2</sub>GACI mixture solution in deuterated *N, N*-dimethylformamide-d<sub>7</sub> (DMF-d<sub>7</sub>).



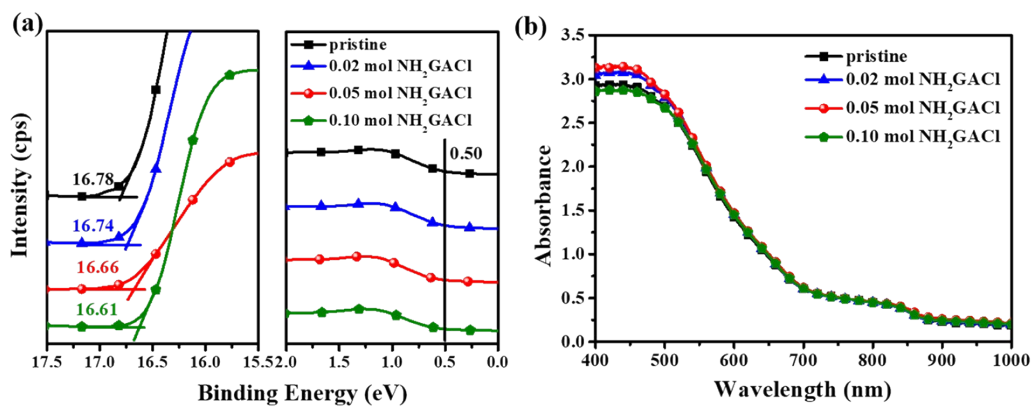

**Figure S8.** (a) Ultraviolet photoelectron spectroscopy (UPS) patterns and (b) UV-vis absorbance spectra of the pristine, 0.02 mol, 0.05 mol and 0.10 mol NH<sub>2</sub>GACI-modified perovskite films.

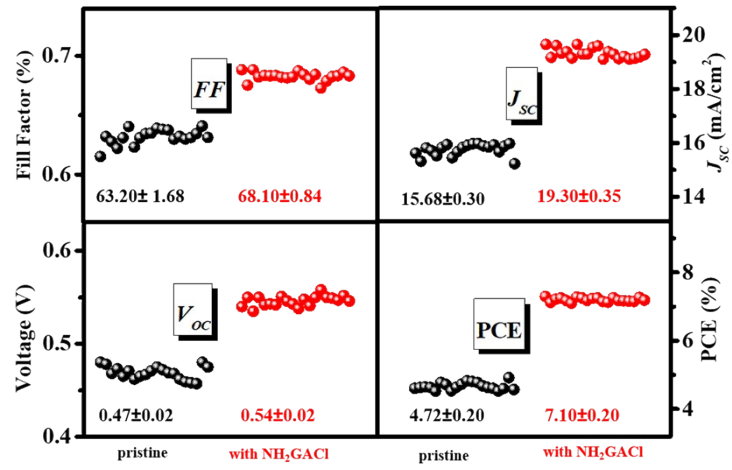

**Figure S9.** A graphical representation of the device characteristics (20 devices).

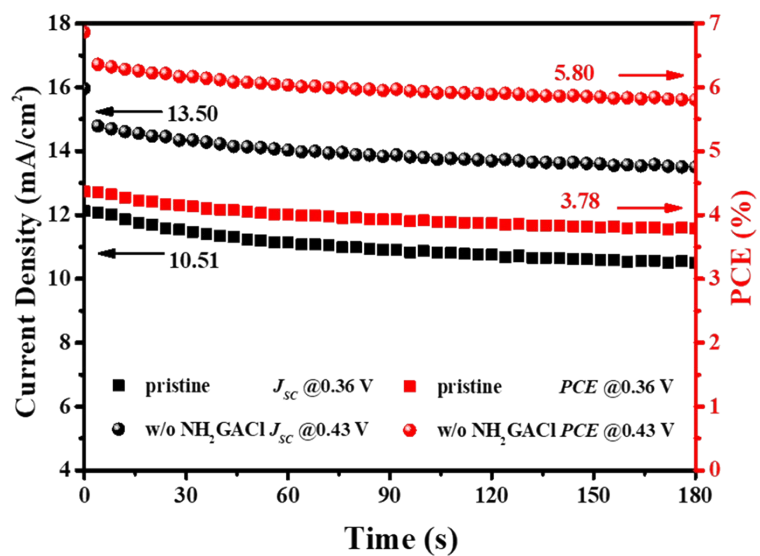

**Figure S10.** Steady-state photocurrent (left) and stabilized PCE (right) of the perovskite devices measured at the maximum power point.

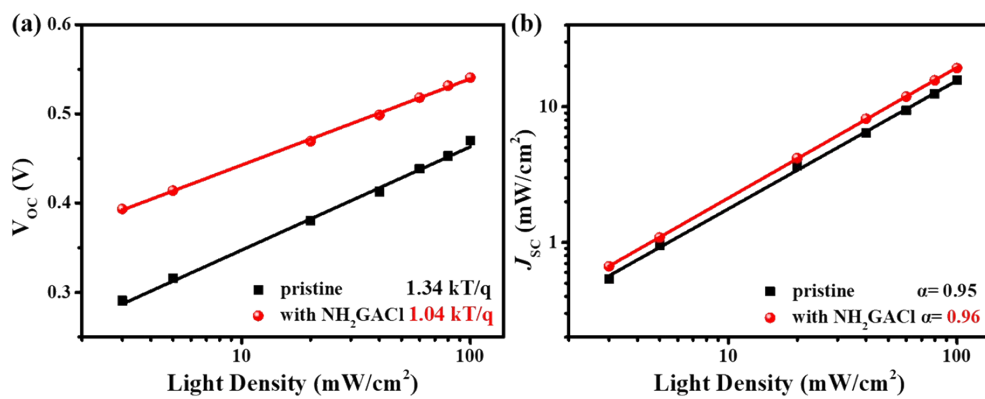

**Figure S11.** (a)  $V_{oc}$  and (b)  $J_{sc}$  of the perovskite solar cells without and with  $\text{NH}_2\text{GACl}$  additive measured under various illumination levels.

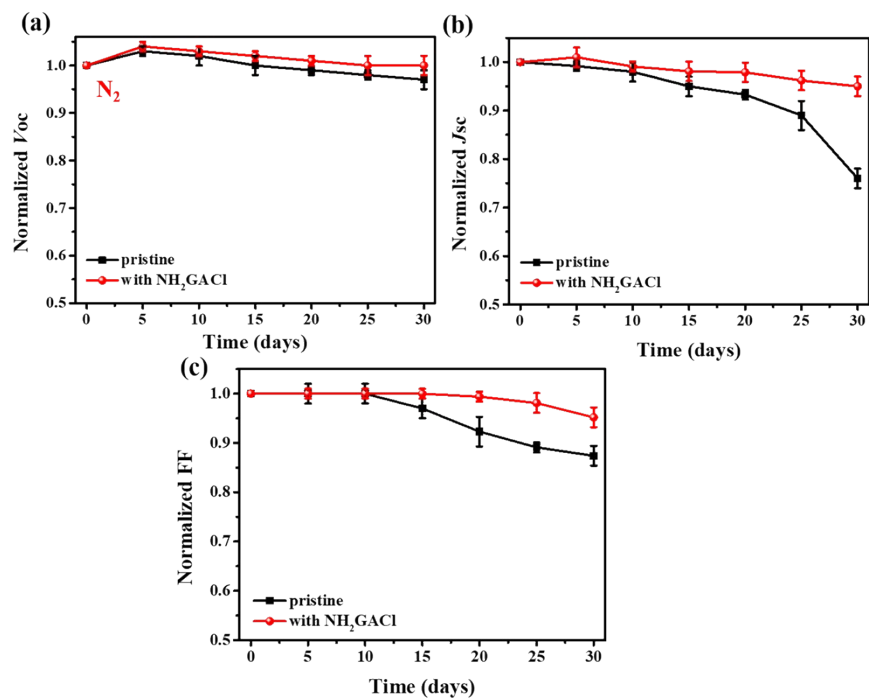

**Figure S12.** Stability of the pristine and  $NH_2GACl$ -modified perovskite solar cells in nitrogen at 25 °C without encapsulation. (a) Normalized  $V_{oc}$ . (b) Normalized  $J_{sc}$ . (c) Normalized FF.

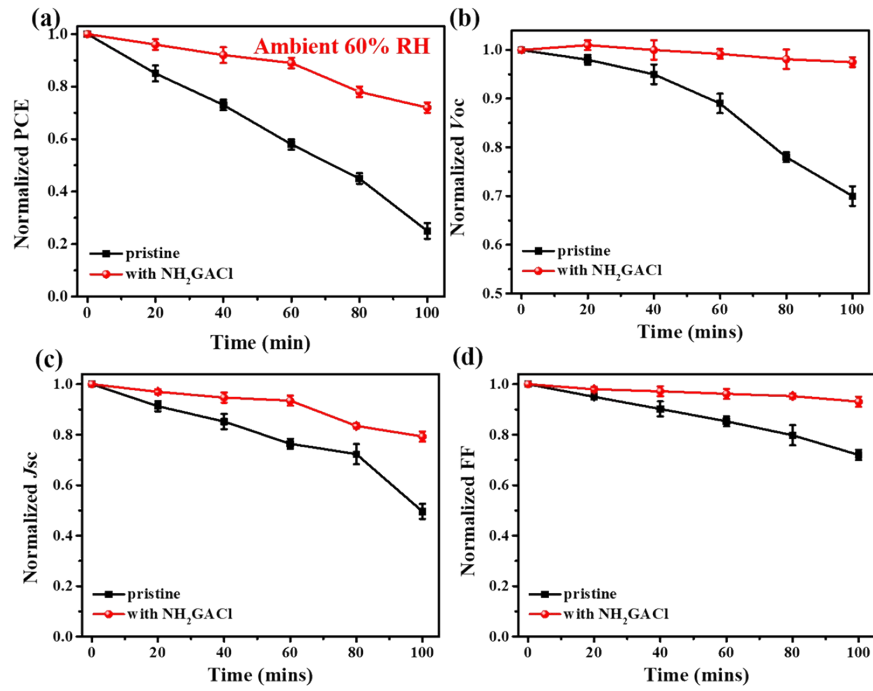

**Figure S13.** Stability of the pristine and NH<sub>2</sub>GACI-modified perovskite solar cells under relative humidity (RH) 60% without encapsulation. (a) Normalized PCE, (b) Normalized  $V_{oc}$ , (c) Normalized  $J_{sc}$ , (d) Normalized FF.

**Table S1.** Photovoltaic parameters of the perovskite solar cells with different concentrations of NH<sub>2</sub>GACl doped in precursor solution.

| Devices                       | $J_{sc}$<br>(mA cm <sup>-2</sup> ) | $V_{oc}$<br>(V) | FF<br>(%) | PCE<br>(%) |
|-------------------------------|------------------------------------|-----------------|-----------|------------|
| pristine                      | 15.98                              | 0.48            | 64.09     | 4.92       |
| 0.02 mol NH <sub>2</sub> GACl | 18.88                              | 0.50            | 67.89     | 6.42       |
| 0.05 mol NH <sub>2</sub> GACl | 19.65                              | 0.54            | 68.84     | 7.30       |
| 0.10 mol NH <sub>2</sub> GACl | 14.52                              | 0.45            | 63.48     | 4.19       |

**Table S2** The different device active areas of Sn-perovskite solar cells in the previous literatures and this work.

| device active areas<br>(cm <sup>2</sup> ) | PCE<br>(%) | Ref.      |
|-------------------------------------------|------------|-----------|
| 0.04                                      | 12.40      | 1         |
| 0.09                                      | 10.1       | 2         |
| 0.0222                                    | 9.6        | 3         |
| 0.04                                      | 9.0        | 4         |
| 0.04                                      | 7.3        | This work |

1. X. Jiang, F. Wang, Q. Wei, H. Li, Y. Shang, W. Zhou, C. Wang, P. Cheng, Q. Chen, L. Chen and Z. Ning, *Nat. Commun.*, 2020, DOI: 10.1038/s41467-020-15078-2.
2. T. Wu, X. Liu, X. He, Y. Wang, X. Meng, T. Noda, X. Yang and L. Han, *Sci. China Chem.*, 2020, **63**, 107-115.
3. E. Jokar, C.-H. Chien, C.-M. Tsai, A. Fathi and E. W.-G. Diau, *Adv. Mater.*, 2019, **31**, 1804835.
4. S. Shao, J. Liu, G. Portale, H.-H. Fang, G. R. Blake, G. H. ten Brink, L. J. A. Koster and M. A. Loi, *Adv. Energy Mater.*, 2018, **8**, 1702019.
